# Supplementary material
Source: publisher site journal article supplement (https://www.dovepress.com/get_supplementary_file.php?f=476439.docx)
Supplement: Supplementary file 1 [file get_supplementary_file.php]

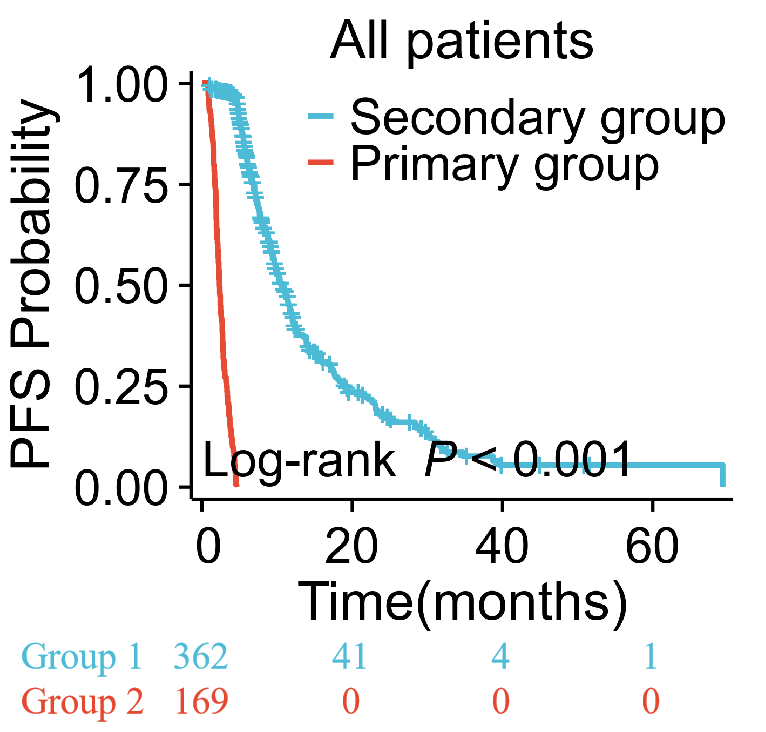


Supplementary figure 1Comparison of Progression-free survival (PFS) between primary and secondary groups in all patients.

| **Supplementary table 1.Primary resistance to lenvatinib: multivariable analysis.** | | |
| --- | --- | --- |
|  | HR (95% CI) | P value |
| Extrahepatic metastasis, n (%) | 1.38(0.60-3.16) | 0.447 |
| AFP>400 ng/ml | 1.76(1.19-2.61) | 0.005 |
| Tumor size>5cm | 1.06(0.71-1.59) | 0.778 |
| BCLC, Cstage | 1.32(0.56-3.07) | 0.527 |
| AFP, alpha-fetoprotein;Tumor size,maximum tumor diameter;BCLC, Barcelona Clinic Liver Cancer. | | |

| **Supplementary table 2. Baseline characteristics of the study population with 2nd-line treatment** | | | |
| --- | --- | --- | --- |
|  | TKI group(n=39) | Combination group(n=145) | P value |
| Age>50,years, n (%) | 32(82.1) | 115(79.3) | 0.705 |
| Male sex, n (%) | 35(89.7) | 123(84.8) | 0.434 |
| Diabetes, n (%) | 5(12.8) | 20(13.8) | 0.875 |
| Hypertension, n (%) | 17(43.5) | 56(38.6) | 0.573 |
| Smoking, n (%) | 14(35.9) | 56(38.6) | 0.756 |
| Drinking, n (%) | 15(38.5) | 50(34.5) | 0.644 |
| HBV, n (%) | 37(94.9) | 139(95.9) | 0.788 |
| Vascular invasion, n (%) | 8(20.5) | 26(17.9) | 0.712 |
| Extrahepatic metastasis, n (%) | 19(48.7) | 66(45.5) | 0.722 |
| Portal hypertension, n (%) | 20(51.3) | 63(43.4) | 0.383 |
| Cirrhosis, n (%) | 31(79.5) | 110(75.9) | 0.635 |
| AFP>400ng/ml, n (%) | 11(28.2) | 48(33.1) | 0.561 |
| ALT>40U/L, n (%) | 15(38.5) | 42(29.0) | 0.255 |
| AST, n (%) | 23(59.0) | 62(42.8) | 0.071 |
| Tumor size>5cm, n (%) | 15(38.5) | 51(35.2) | 0.704 |
| Child, B stage, n (%) | 12(30.7) | 28(19.3) | 0.124 |
| BCLC, Cstage, n (%) | 23(59.0) | 76(52.4) | 0.466 |
| HBV,hepatitis B virus;AFP, alpha-fetoprotein; ALT, alanine aminotransferase;AST, aspartate aminotransferase;Tumor size,maximum tumor diameter;BCLC, Barcelona Clinic Liver Cancer. | | | |
